# Supplementary material
Source: HighWire-hosted journal article supplement (https://tobaccocontrol.bmj.com/content/32/3/275)
Supplement: inline-supplementary-material-2 [file inline-supplementary-material-2.pdf]

## Supplementary File 2

## List of cases (litigations) analyzed in the study

| Cases involving the Prevention of Food Adulteration, 1954 |                                                                                                                                                                            |
|-----------------------------------------------------------|----------------------------------------------------------------------------------------------------------------------------------------------------------------------------|
| 1                                                         | Godawat Pan Masala Products I.P. Ltd. and Ors. vs. Union of India (UOI) and Ors. (02.08.2004 - SC) : MANU/SC/0574/2004                                                     |
| 2                                                         | Khedan Lal and Sons vs. The State of UP and Ors. (30.01.1970 - ALLHC) : MANU/UP/0245/1970                                                                                  |
| 3                                                         | Khedan Lal and Sons vs. State of U.P. and Ors. (18.08.1980 - ALLHC) : MANU/UP/0376/1980                                                                                    |
| 4                                                         | Kothari Chemicals vs. Union of India (UOI) (27.09.1995 - ALLHC) : MANU/UP/0739/1995                                                                                        |
| 5                                                         | State of U.P. vs. Shri Ram Gupta (23.12.1971 - ALLHC) : MANU/UP/0408/1971                                                                                                  |
| 6                                                         | Manohar Lal vs. State of U.P. (22.07.1989 - ALLHC) : MANU/UP/0921/1989                                                                                                     |
| 7                                                         | Chandra Shekhar and Ors. vs. State (02.03.1982 - ALLHC) : MANU/UP/0909/1982                                                                                                |
| 8                                                         | Shivshakti Agencies vs. State of A.P. and Ors. (16.08.2002 - APHC) : MANU/AP/1388/2002                                                                                     |
| 9                                                         | Md. Mahmood and Ors. vs. The State of Andhra Pradesh (05.04.2006 - APHC) : MANU/AP/0571/2006                                                                               |
| 10                                                        | Society for Cancer in Oral-Cavity Prevention through Education, Hyderabad vs. Union of India (UOI) and Ors. (23.04.2002 - APHC) : MANU/AP/0422/2002                        |
| 11                                                        | The Food Inspector, Div. II vs. D. Ravindranath and Ors. (18.11.2004 - APHC) : MANU/AP/1125/2004                                                                           |
| 12                                                        | Dhariwal Industries Ltd. and Ors. vs. Union of India (UOI) and Ors. (18.09.2002 - BOMHC) : MANU/MH/1185/2002                                                               |
| 13                                                        | Sainath Traders and Ors. vs. Commissioner of Food and Drug Administration and Ors                                                                                          |
| 14                                                        | Sai Traders and Ors. vs. State of Goa and Ors. (07.06.2006 - BOMHC) : MANU/MH/0300/2006                                                                                    |
| 15                                                        | Dilipsinh vs. The State of Maharashtra (26.02.2010 - BOMHC) : MANU/MH/0157/2010                                                                                            |
| 16                                                        | Vishnu Packaging, a Partnership firm and Ors. vs. Union of India and Ors. (07.12.2011 - BOMHC) : MANU/MH/1571/2011                                                         |
| 17                                                        | Dhariwal Industries Limited and Ors. vs. The State of Maharashtra and Ors. (15.09.2012 - BOMHC) : MANU/MH/1519/2012                                                        |
| 18                                                        | Sainath Traders and Ors. Vs. Commissioner of Food and Drug Administration and Food (Health) Authority and Ors. MANU/MH/2048/2016                                           |
| 19                                                        | Rasiklal and Ors. vs. The State of Maharashtra and Ors. (05.05.2016 - BOMHC) : MANU/MH/2896/2016                                                                           |
| 20                                                        | State of Maharashtra vs. Ramnath Punamchand Dayama and Ors. (08.05.2017 - BOMHC) : MANU/MH/2823/2017                                                                       |
| 21                                                        | Municipal Corporation of the City of Amravati vs. Ghanshyam Uttamchand Batra and Ors. (31.07.2018 - BOMHC) : MANU/MH/2326/2018                                             |
| 22                                                        | The Ahmednagar Municipal Council vs. Dullabhadas Haridas Patel and Ors. (01.12.2009 - BOMHC) : MANU/MH/1444/2009                                                           |
| 23                                                        | Rajiv Kumar Gupta and Ors. vs. The State of Maharashtra (28.10.2005 - BOMHC) : MANU/MH/1299/2005                                                                           |
| 24                                                        | Rasiklal and Prakash vs. The State of Maharashtra and Ors. (02.07.2013 - BOMHC) : MANU/MH/0846/2013                                                                        |
| 25                                                        | State vs. Mustawueen Mohammad and Ors. (15.04.2013 - BOMHC) : MANU/MH/0684/2013                                                                                            |
| 26                                                        | K.P. Sugandh Limited and Etc. vs. State of Chhattisgarh and Ors. (28.02.2008 - CGHC) : MANU/CG/0032/2008                                                                   |
| 27                                                        | Sonal Food Products and Ors. vs. State (17.11.2006 - DELHC) : MANU/DE/9839/2006                                                                                            |
| 28                                                        | Ram Babu Rastogi and Ors. vs. State (22.12.2011 - DELHC) : MANU/DE/7058/2011                                                                                               |
| 29                                                        | Prince Gutka Ltd. vs. State and Ors. (01.03.1999 - DELHC) : MANU/DE/0868/1999                                                                                              |
| 30                                                        | Bishan Dass Mehta and Ors. vs. Union of India and Ors. (24.04.1970 - DELHC) : MANU/DE/0011/1970                                                                            |
| 31                                                        | Kiritkumar Budhalal Patel vs. State of Gujarat (05.10.2000 - GUJHC) : MANU/GJ/0438/2000                                                                                    |
| 32                                                        | Royal Marvar Tobacco Pvt Ltd and Ors. vs. State of Gujarat and Ors. (13.10.2010): In the High Court of Gujarat at Ahmedabad Special Criminal Application No. 1839 of 2010. |
| 33                                                        | State of Gujarat vs. M/s Chetna Jarda Company (Manufacturing Firm) & 1 (13.09.2011 - GUJHC) : MANU/GJ/1014/2011                                                            |
| 34                                                        | Iqbal Musabhai Hunani vs. State of Gujarat and Anr. (31.07.1992 - GUJHC) : MANU/GJ/0261/1992                                                                               |
| 35                                                        | State of Gujarat vs. Sanjay Kumar Nagindas Shah Vendor and Ors. (13.01.2010 - GUJHC) : MANU/GJ/1625/2010                                                                   |
| 36                                                        | State of Gujarat vs. M/s Chetna Jarda Company (Manufacturing Firm) & 1 (13.09.2011 - GUJHC) : MANU/GJ/1014/2011                                                            |
| 37                                                        | Kiritkumar Budhalal Patel vs. State of Gujarat (05.10.2000 - GUJHC) : MANU/GJ/0438/2000                                                                                    |

|                                                                |                                                                                                                                                                                                                                                                                      |
|----------------------------------------------------------------|--------------------------------------------------------------------------------------------------------------------------------------------------------------------------------------------------------------------------------------------------------------------------------------|
| 38                                                             | State of Assam vs. Ram Karani and Ors. (10.09.1986 - GUHC) : MANU/GH/0033/1986                                                                                                                                                                                                       |
| 39                                                             | Tirupati Products (P1) and Haji Shah(P2) Hussain Buksh Khand Sons Khan and Sons and Anr. vs. State of Jharkhand and Ors. (07.03.2005 - JHRHC) : MANU/JH/0081/2005                                                                                                                    |
| 40                                                             | Raju Laxman Pachapure v. State of Karnataka and Otrs. WP No. 15119 of 2006                                                                                                                                                                                                           |
| 41                                                             | The Malnad Areca Marketing Co-operative Society Ltd. and Ors. vs. Union of India (UOI) and Anr. (04.04.2007 - KARHC) : MANU/KA/7098/2007                                                                                                                                             |
| 42                                                             | Shivraj Tobacco Company Pvt. Ltd. vs. State of Madhya Pradesh (02.11.1989 - MPHC) : MANU/MP/0290/1989                                                                                                                                                                                |
| 43                                                             | R.P. Sharma vs. State (18.11.2004 - MADHC) : MANU/TN/1353/2004.                                                                                                                                                                                                                      |
| 44                                                             | Lekhraj vs. The State of Tamil Nadu (01.09.2006 - MADHC) : MANU/TN/6098/2006                                                                                                                                                                                                         |
| 45                                                             | Indradeo Dwarika Singh vs. State of Bihar and Ors. (03.10.2017 - PATNAHC) : MANU/BH/1651/2017                                                                                                                                                                                        |
| 46                                                             | Md. Sagir and Md. Mukhtar Alam vs. State of Bihar and Anr. (19.03.2009 - PATNAHC) : MANU/BH/0122/2009                                                                                                                                                                                |
| 47                                                             | R.P. Patel vs. State of Punjab (09.08.1997 - PHHC) : MANU/PH/0898/1997                                                                                                                                                                                                               |
| 48                                                             | Kailash vs. The State of Rajasthan (29.01.1985 - RAJHC) : MANU/RH/0339/1985                                                                                                                                                                                                          |
| <b>Cases involving the Food Safety and Standards Act, 2006</b> |                                                                                                                                                                                                                                                                                      |
| 1                                                              | Central Arecanut Marketing Company and Others v. Union of India, Transfer Case (Civil) No. 1/2010 (2016).                                                                                                                                                                            |
| 2                                                              | Ankur Gutkha v. India Asthma Care Society, Petition(s) for Special Leave to Appeal (Civil) No(s). 16308/2007, Supreme Court of India (April 3, 2013).                                                                                                                                |
| 3                                                              | Jeetmal Ramesh Kumar vs. The Commissioner, Food Safety and Drug Administration Department and Ors. (14.02.2019 - MADHC) : MANU/TN/2513/2019                                                                                                                                          |
| 4                                                              | Order dated 2.08.2012 W.P.(C) Nos. 12352, 12932, 13271 & 13773 of 2012 Kerala HC                                                                                                                                                                                                     |
| 5                                                              | Sanjay Anjay Stores and Ors. vs. The Union of India and Ors. 2014 (01.11.2017 - CALHC) : MANU/WB/0846/2017                                                                                                                                                                           |
| 6                                                              | Court on its own motion vs. State of Himachal Pradesh and Ors. (06.11.2018 - HPHC) : Citation : MANU/HP/1706/2018                                                                                                                                                                    |
| 7                                                              | Yadav v. State of Bihar, et al., No. 10297, High Court of Judicature at Patna (2012)                                                                                                                                                                                                 |
| 8                                                              | M/S R.K. Products Company v. Union of India et al. Patna High Court CWJC No.12871 of 2012 (2) dt.20-07-2012                                                                                                                                                                          |
| 9                                                              | M/s Prabhat Zarda Factory India v. State of Bihar, Case No. 19286 of 2014; Rajat Industries v. State of Bihar, Case No. 19232 of 2014; M/s R.K. Enterprises v. Union of India, Case No. 19960 of 2014; M/s Khan Brothers v. Union of India, Case No. 20129 of 2014. dated 23.12.2014 |
| 10                                                             | Pankaj Chhabra and Ors. vs. The State of Bihar and Ors. (01.06.2016 - PATNAHC) : MANU/BH/0582/2016                                                                                                                                                                                   |
| 11                                                             | Omkar Agency and Ors. vs. The Food Safety and Standards Authority of India and Ors. (19.07.2016 - PATNAHC) : MANU/BH/0504/2016                                                                                                                                                       |
| 12                                                             | Jayavilas Tobacco Traders LLP vs. The Designated Officer, Food Safety and Drugs Control Dept. (09.06.2017 - MADHC) : MANU/TN/2146/2017                                                                                                                                               |
| 13                                                             | J. Anbazhagan vs. The Union of India and Ors. (26.04.2018 - MADHC) : MANU/TN/2109/2018                                                                                                                                                                                               |
| 14                                                             | Ghoi Foods Private Limited v. UOI, WP No. 3131, Madhya Pradesh, Gwalior High Court (2012).                                                                                                                                                                                           |
| 15                                                             | Amarchand Upadhyay And Anr. vs Union Of India, W. P. No.10998/2012, High Court of Madhya Pradesh                                                                                                                                                                                     |
| 16                                                             | Manoj Kumar Jain vs. State of M.P. (24.10.2017 - MPHC) : MANU/MP/1089/2017                                                                                                                                                                                                           |
| 17                                                             | Joshy vs. State of Kerala (20.12.2012 - KERHC) : MANU/KE/2254/2012                                                                                                                                                                                                                   |
| 18                                                             | Ghodawat Pan Masala v. State of Karnataka, W.P. No. 78378-78380/2013, High Court of Karnataka, Dharwad (2013).                                                                                                                                                                       |
| 19                                                             | Doctors for You v. State of Delhi, W.P.(C) 5103/2012, High Court of Delhi at New Delhi (2012).                                                                                                                                                                                       |
| 20                                                             | Dhariwal Industries Limited and Ors. vs. The State of Maharashtra and Ors. (15.09.2012 - BOMHC) : MANU/MH/1519/2012                                                                                                                                                                  |
| 21                                                             | S.J.J. Exports Company v. Food Safety Commissioner, W.P. No. 2266 of 2012, High Court of Judicature at Bombay (2013).                                                                                                                                                                |
| 22                                                             | Vishnu Pouch Packaging Pvt. Ltd. vs. The State of Maharashtra and Ors. (01.02.2013 - BOMHC) : MANU/MH/2486/2013                                                                                                                                                                      |
| 23                                                             | Vijay Shantilal Chopada vs. The State of Maharashtra and Ors. (29.09.2016 - BOMHC) : MANU/MH/2065/2016                                                                                                                                                                               |
| 24                                                             | Indian Dental Association U.P. State and Ors. vs. State of U.P. and Ors. (17.09.2012 - ALLHC) : MANU/UP/1686/2012                                                                                                                                                                    |
